# Supplementary material for: Modeling the Excess Cell Surface Stored in a Complex Morphology of Bleb-Like Protrusions
Source: PLOS journal article supplement (doi:10.1371/journal.pcbi.1004841), 2016-03-25
Supplement: S5 (10.1371/journal.pcbi.1004841.s005) [file journal.pcbi.1004841.s005]

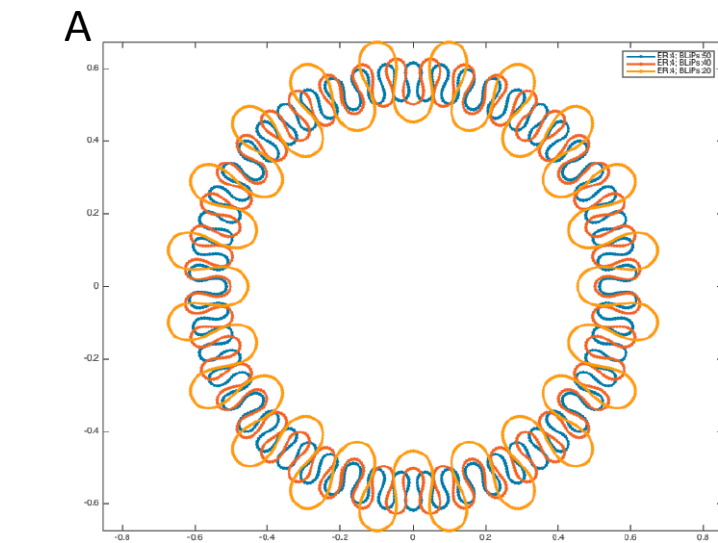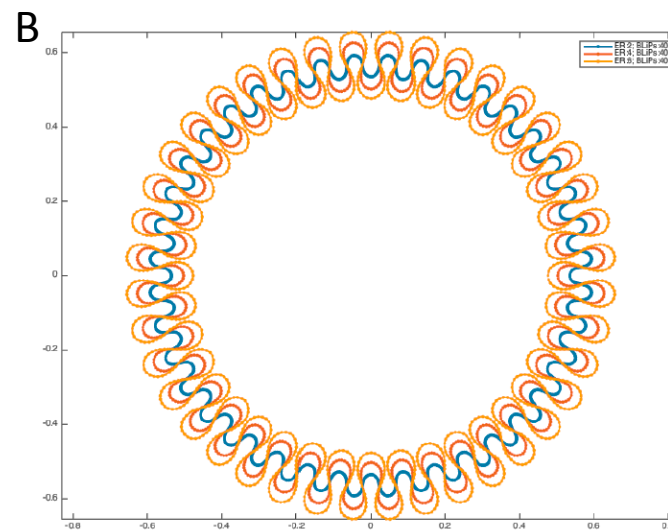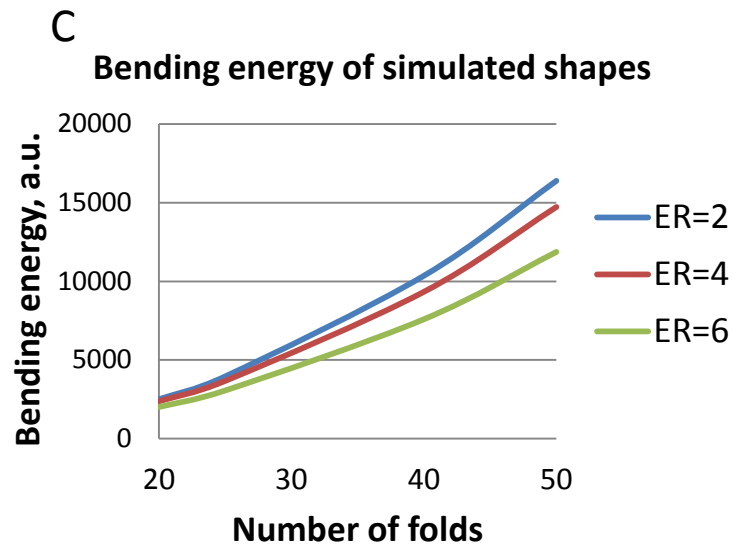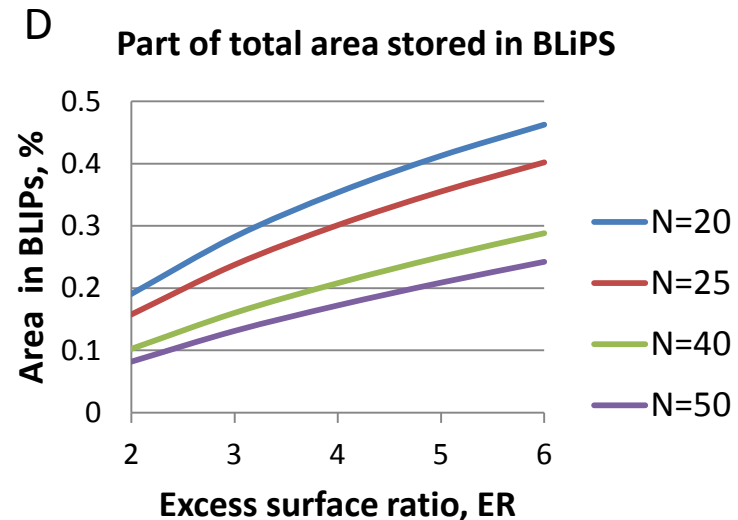

S3 Fig. A. Three overlapping shapes, each has the same area and initial excess ratio  $ER=4$ . The shapes were prescribed to have different number of folds: 20 (yellow), 40 (red), 50 (blue). The blue shape has smaller local radius along the perimeter which results in higher bending energy. B. Three overlapping shapes, each has the same area and number of folds,  $N=40$ . The shapes have different initial excess ratio: 6 (yellow), 4 (red), 2 (blue). The blue shape has smaller local radius along the perimeter which results in higher bending energy. C. Plot of bending energy for simulated shapes with different  $ER$ s and number of folds. D. Plot of area stored in BLiPs for different shape configurations.
